# Supplementary material
Source: Springer Nature journal article supplement (https://www.springermedizin.de/resource/supplementary/12936_2014_3664_MOESM7_ESM.pdf/9546136)

Gametocytes/ $\mu\text{L}$

5000

500

50

Before

24h

post PQ

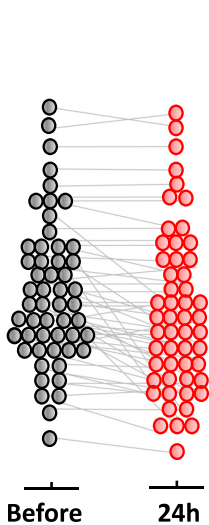

Oocysts (%)

100

50

0

Before

24h

post PQ

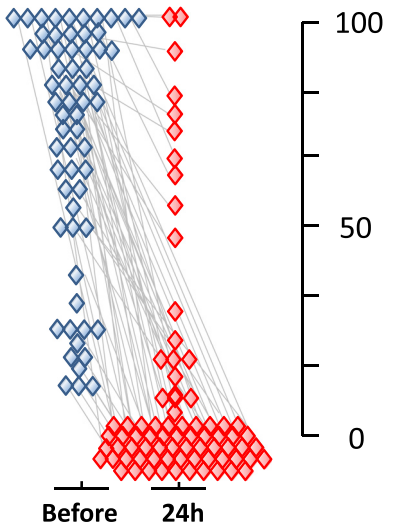

Supplement: MOESM7 [file 9546136]
